# Supplementary material
Source: HighWire-hosted journal article supplement (https://www.ajevonline.org/content/suppl/2020/12/19/ajev.2020.20030)

Supplemental Data for:

Bhattarai G, Fennell A, Londo JP, Coleman C and Kovacs LG. 2021.

A novel grape downy mildew resistance locus from *Vitis rupestris*. Am J Enol Vitic 72:12-20. doi: 10.5344/ajev.2020.20030.

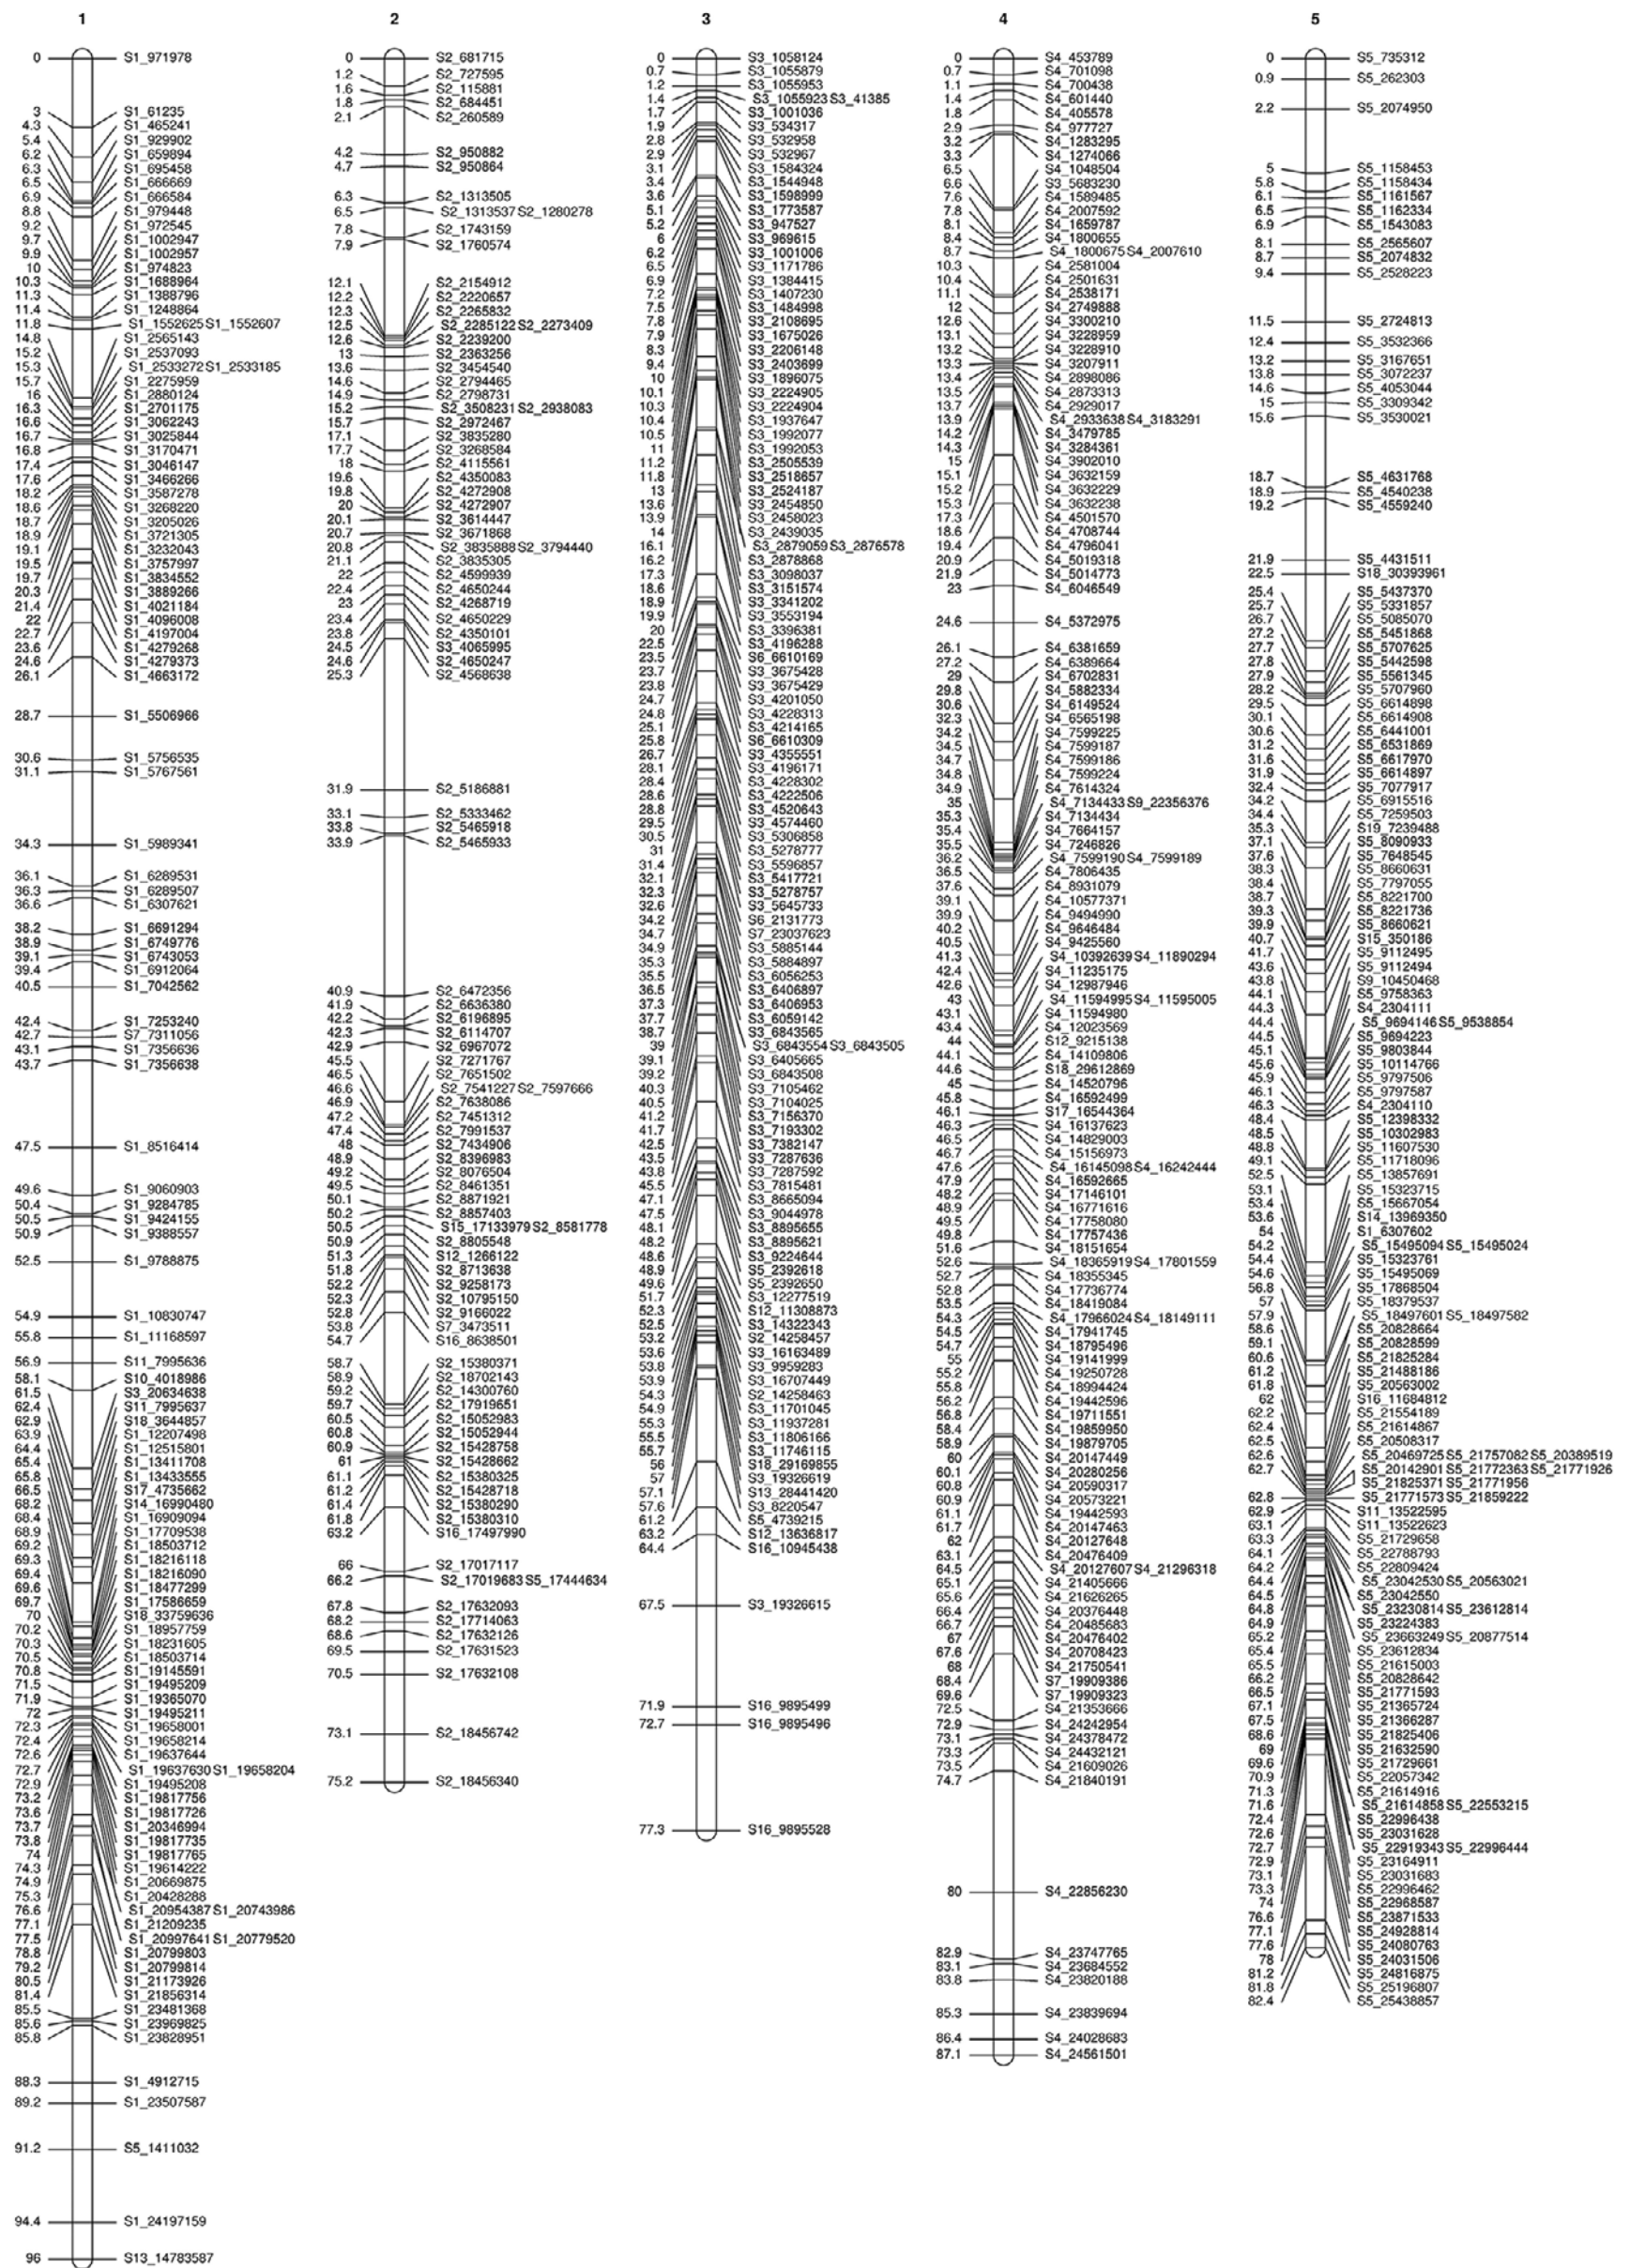

Supplemental Figure 2 Integrated linkage map (continued on pages 2-4).

Supplemental Data for:

Bhattarai G, Fennell A, Londo JP, Coleman C and Kovacs LG. 2021.

A novel grape downy mildew resistance locus from *Vitis rupestris*. Am J Enol Vitic 72:12-20. doi: 10.5344/ajev.2020.20030.

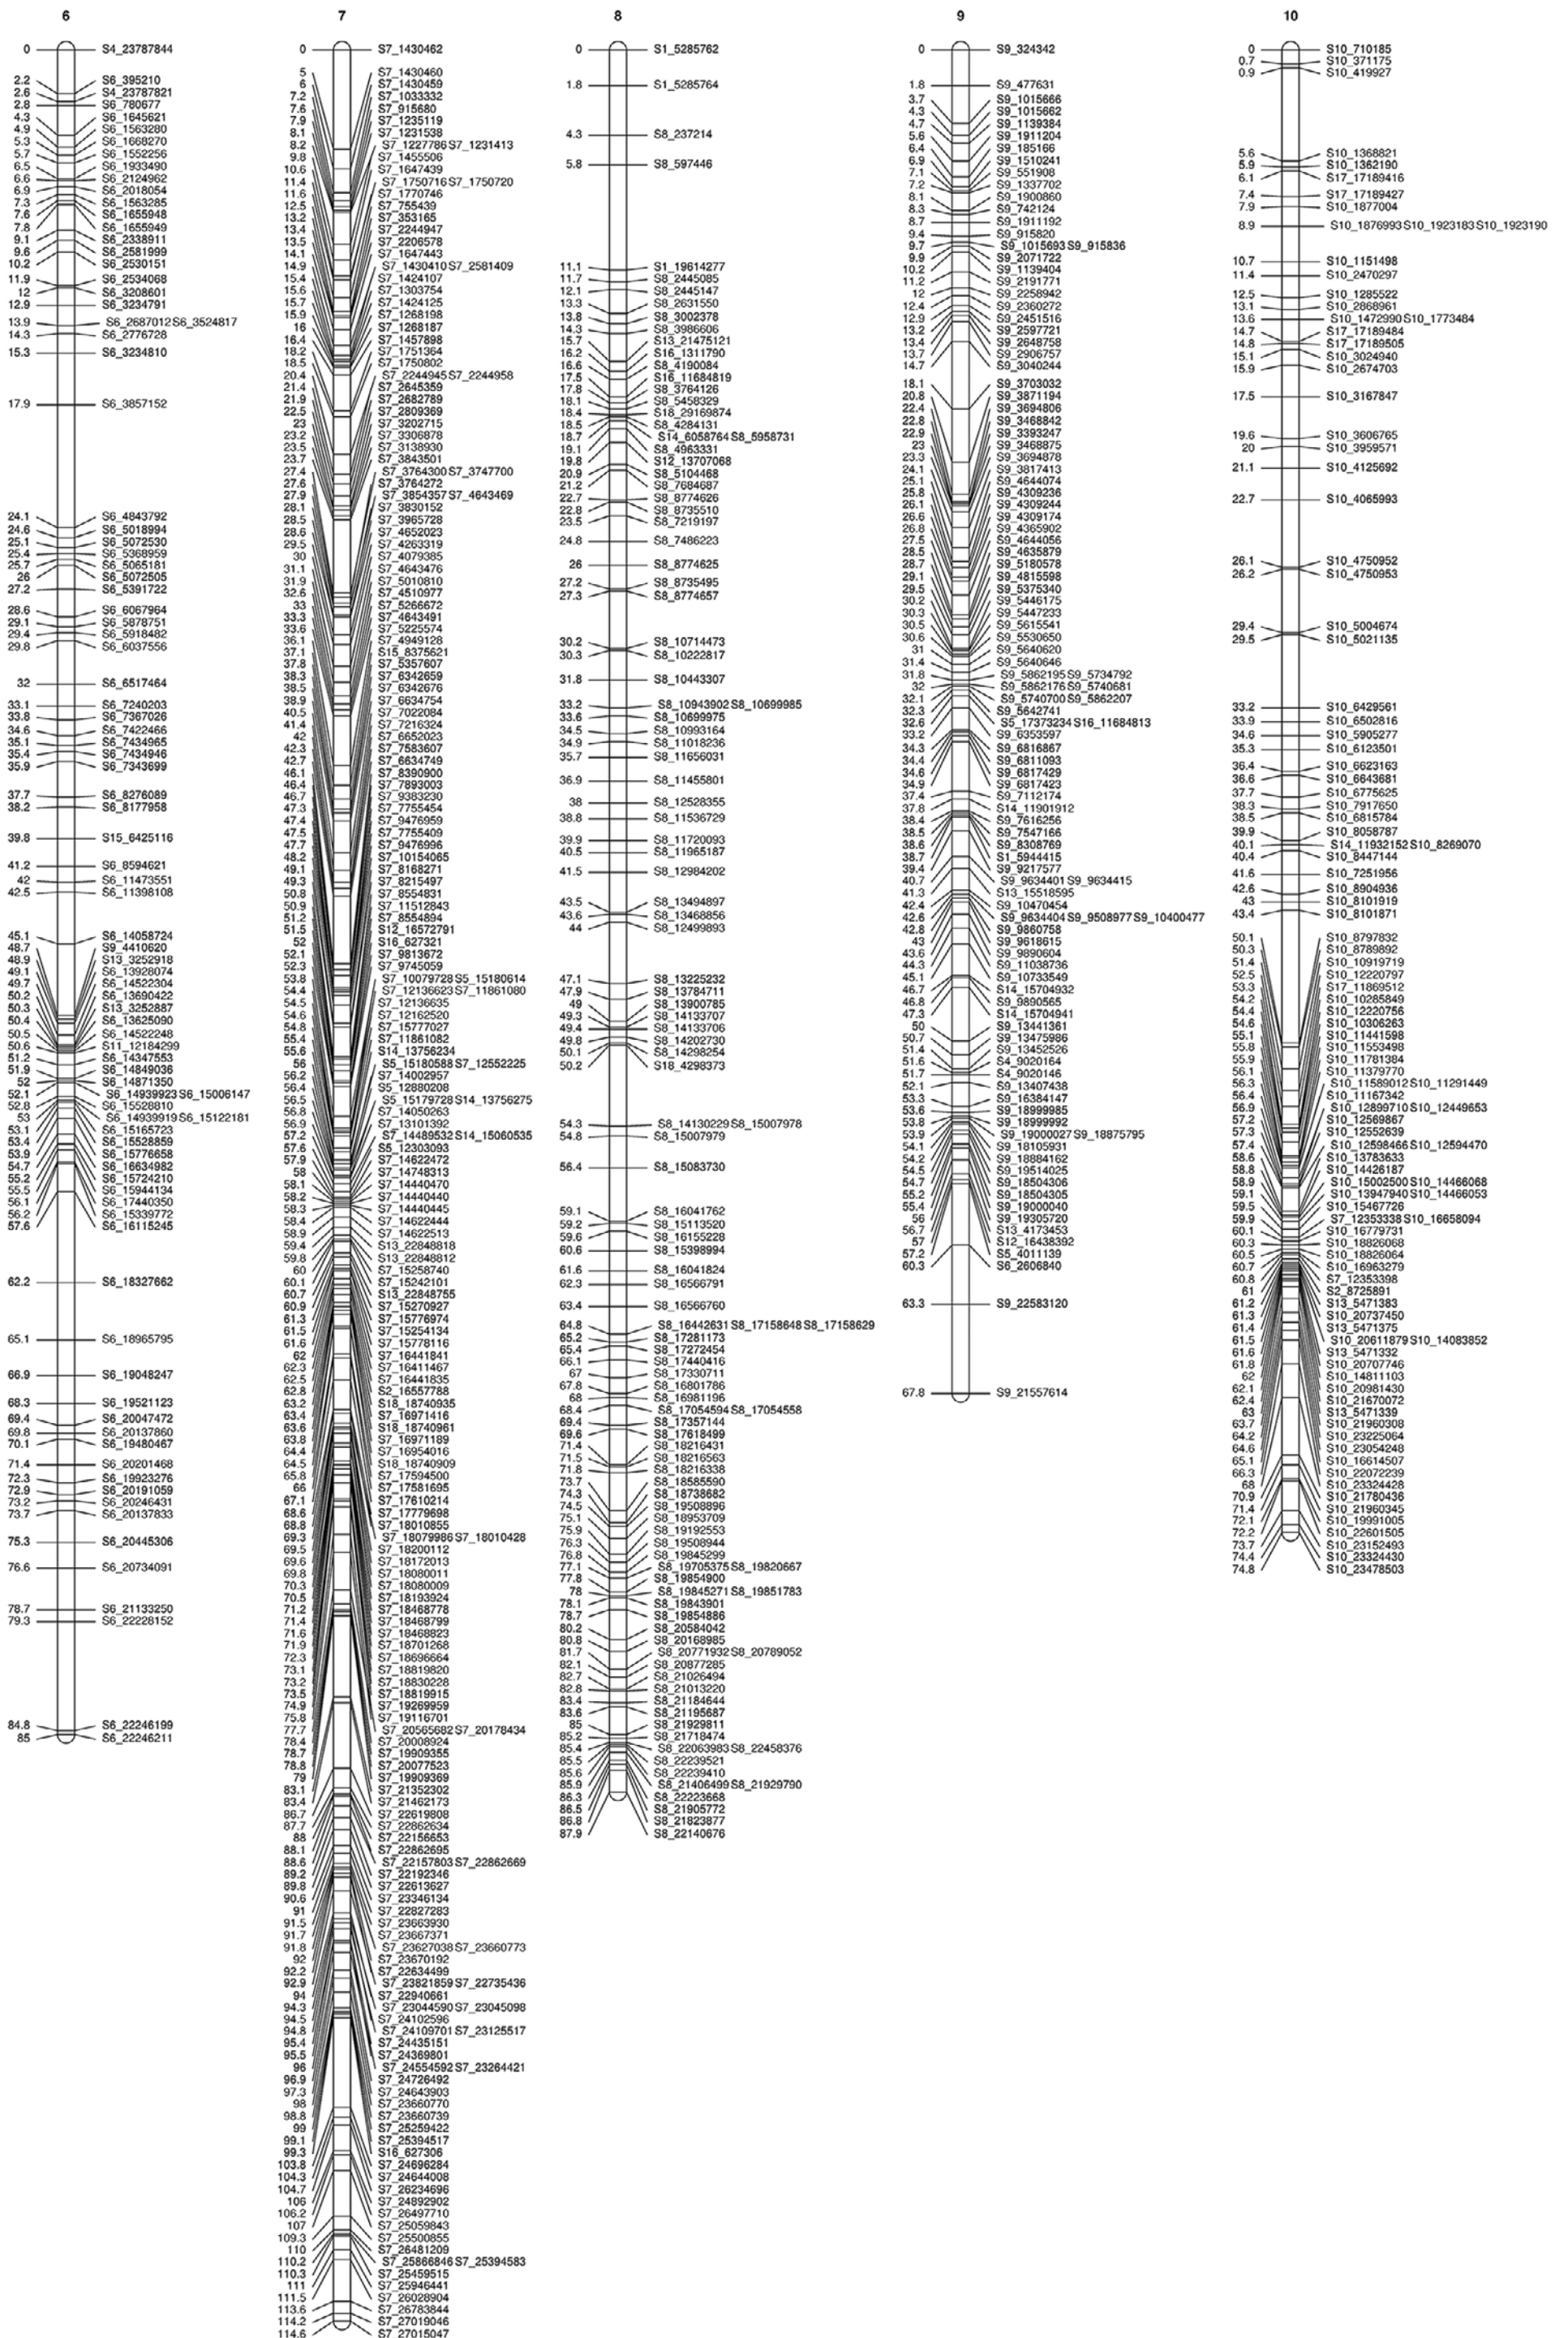

Supplemental Data for:

Bhattarai G, Fennell A, Londo JP, Coleman C and Kovacs LG. 2021.

A novel grape downy mildew resistance locus from *Vitis rupestris*. Am J Enol Vitic 72:12-20. doi: 10.5344/ajev.2020.20030.

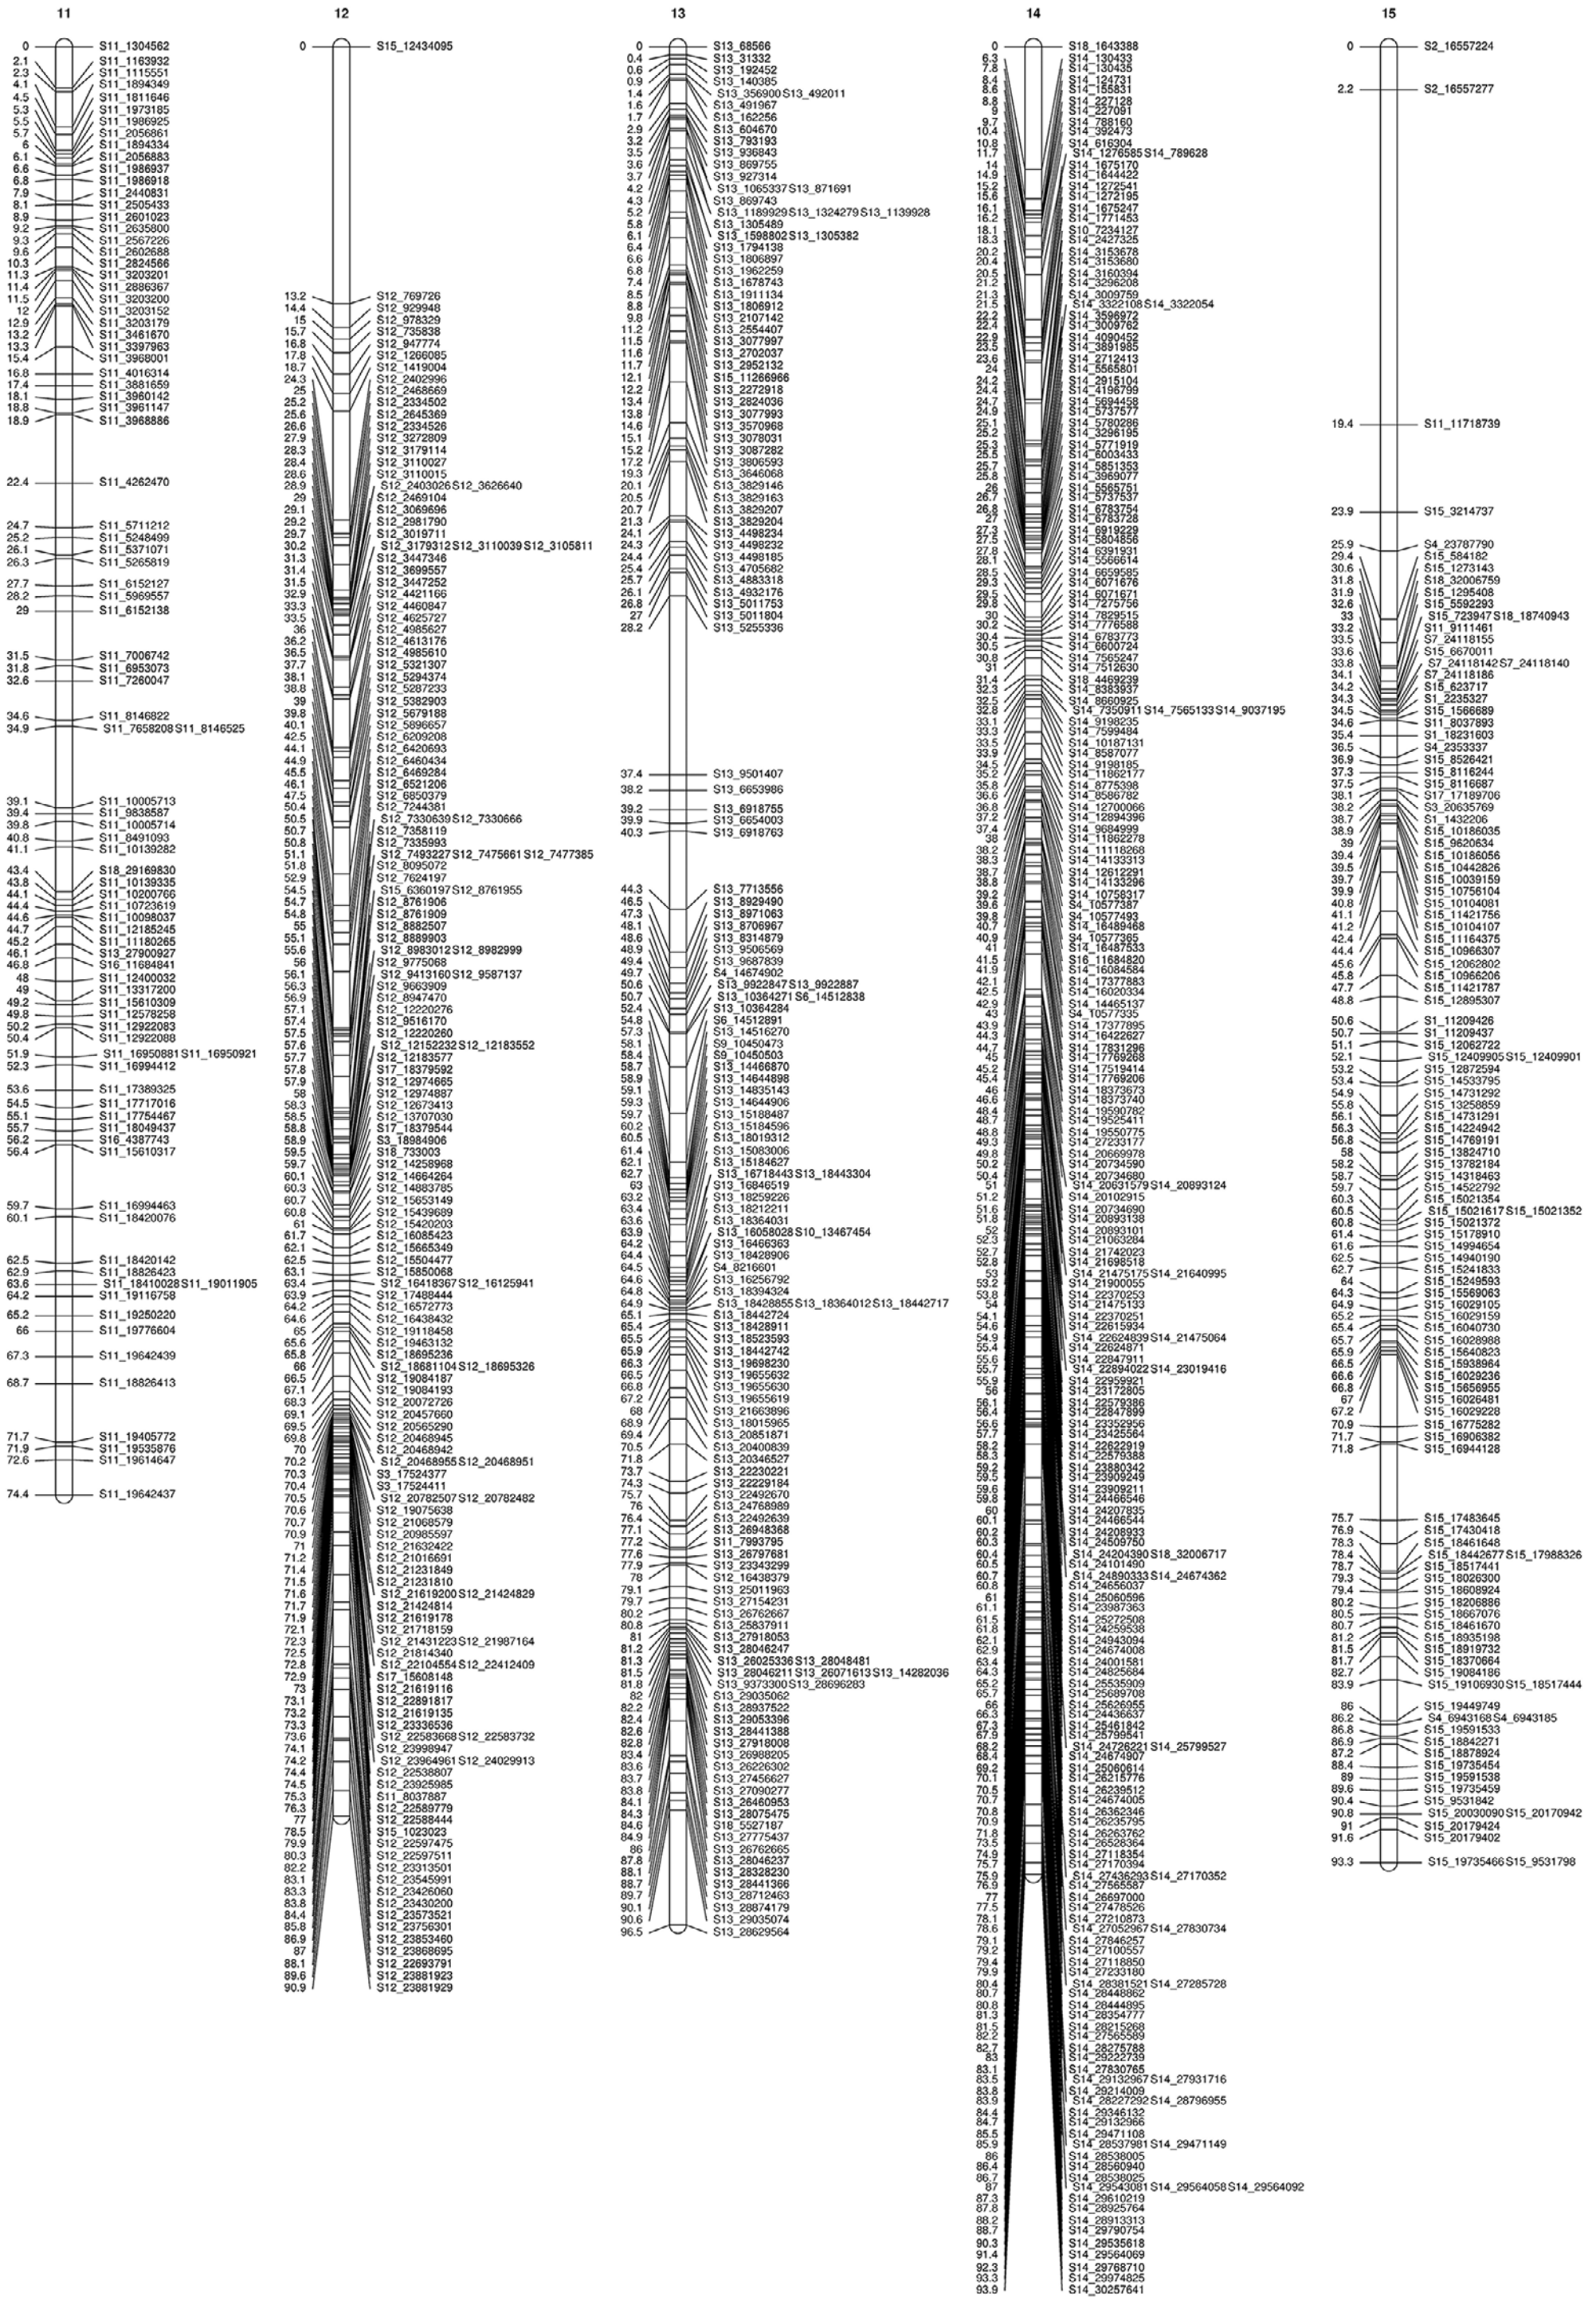

Supplemental Data for:

Bhattarai G, Fennell A, Londo JP, Coleman C and Kovacs LG. 2021.

A novel grape downy mildew resistance locus from *Vitis rupestris*. Am J Enol Vitic 72:12-20. doi: 10.5344/ajev.2020.20030.

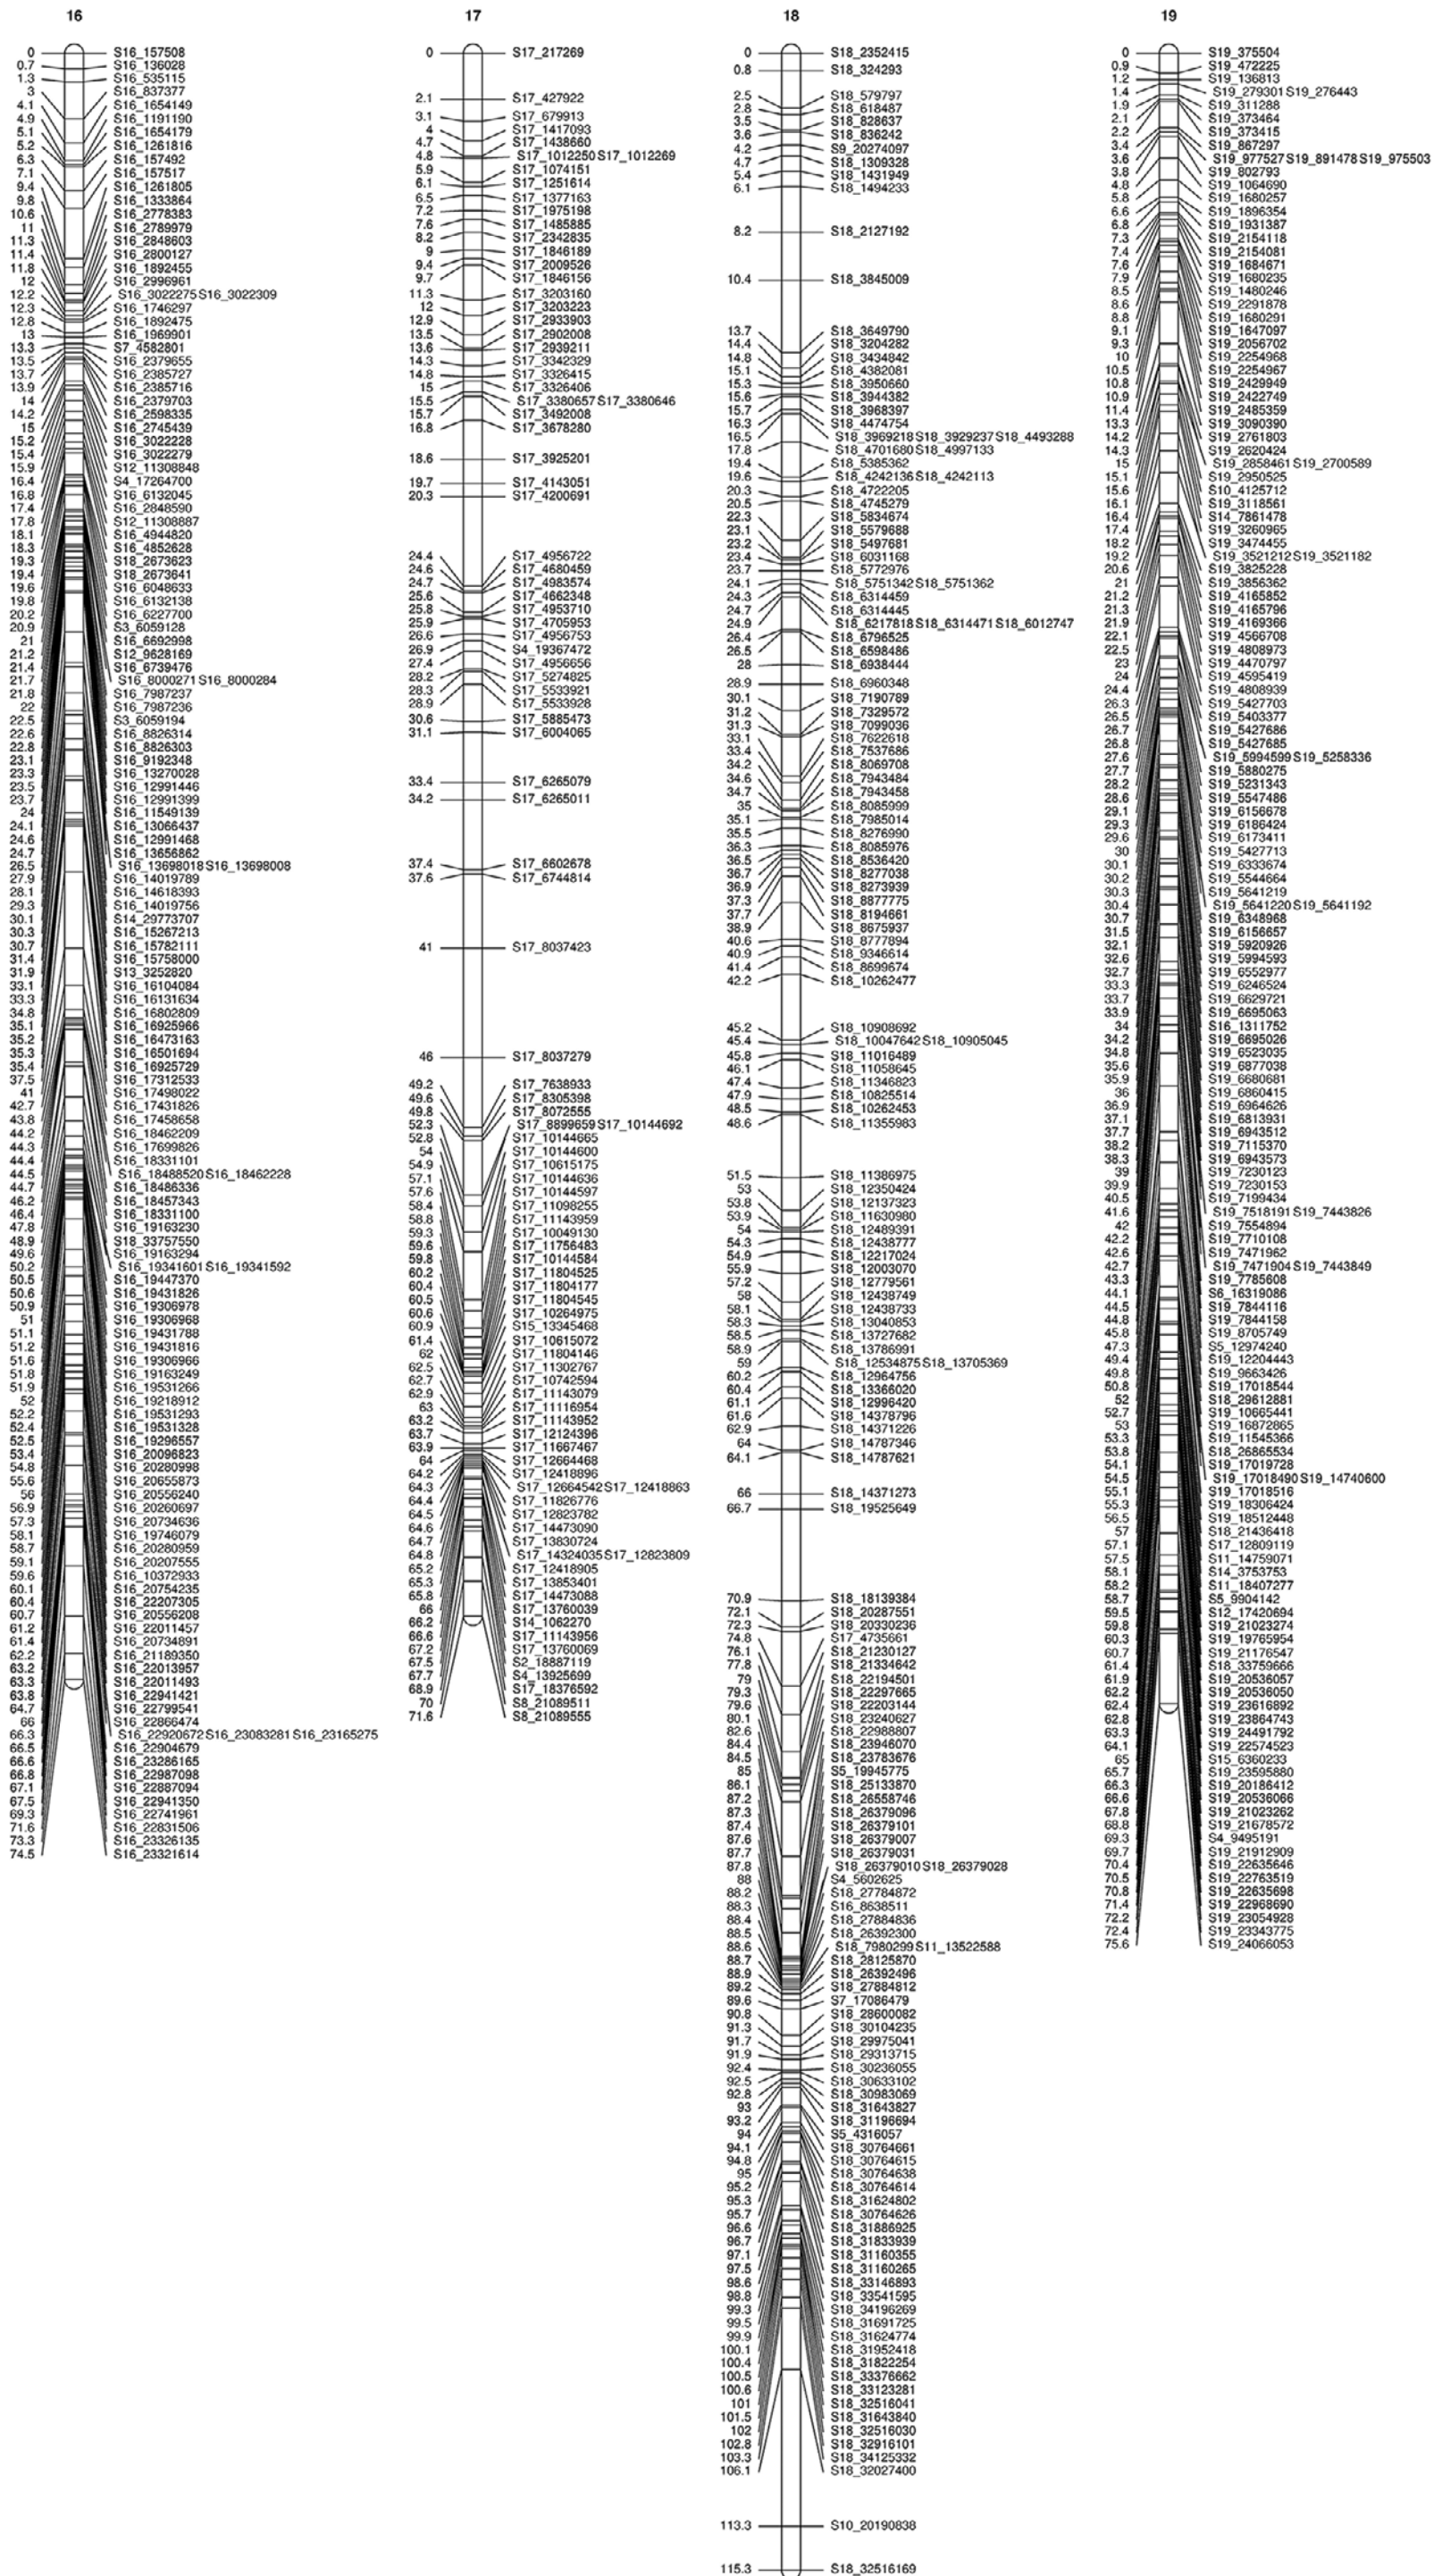

Supplement: SupplementalFigure2.pdf [file SupplementalFigure2.pdf]
